# Supplementary material
Source: PubMed Central journal article supplement (PMC5518634)

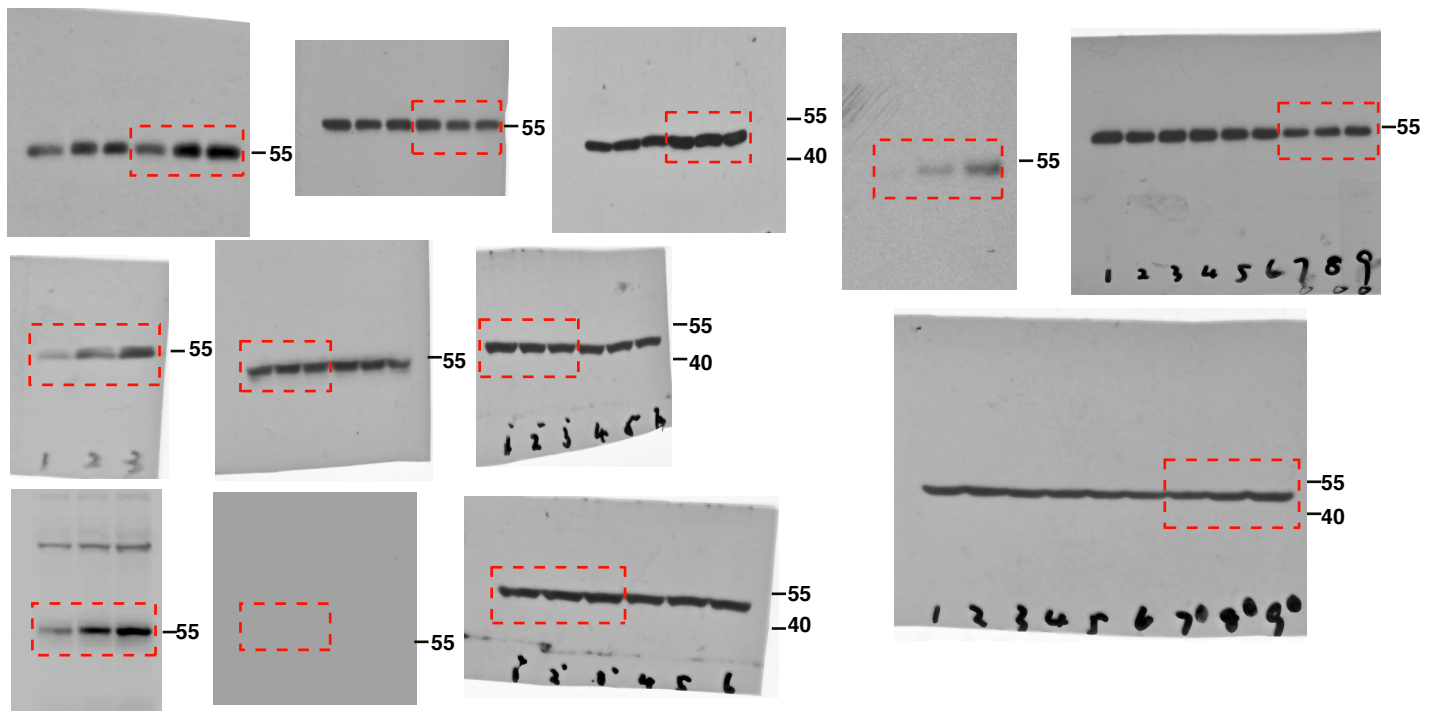

Fig.1a

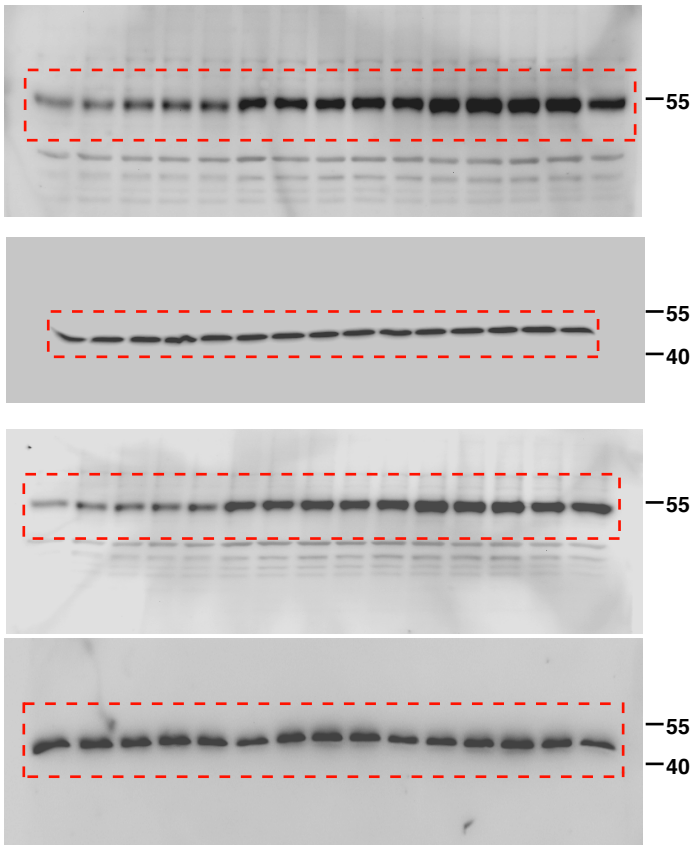

Fig.1c

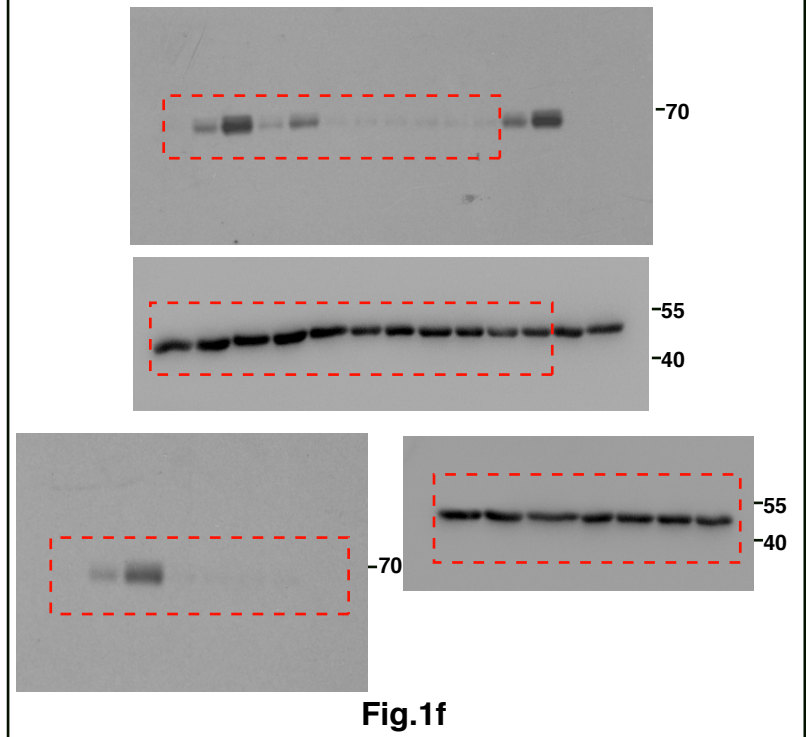

Fig.1f

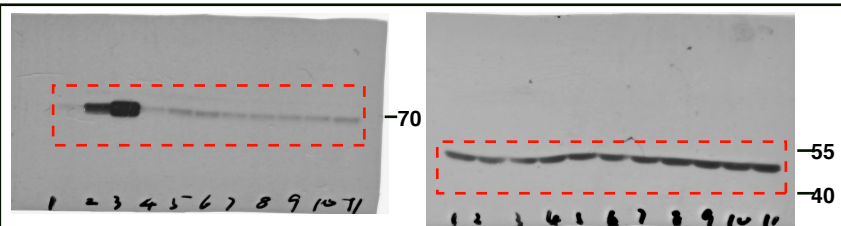

Fig.1e

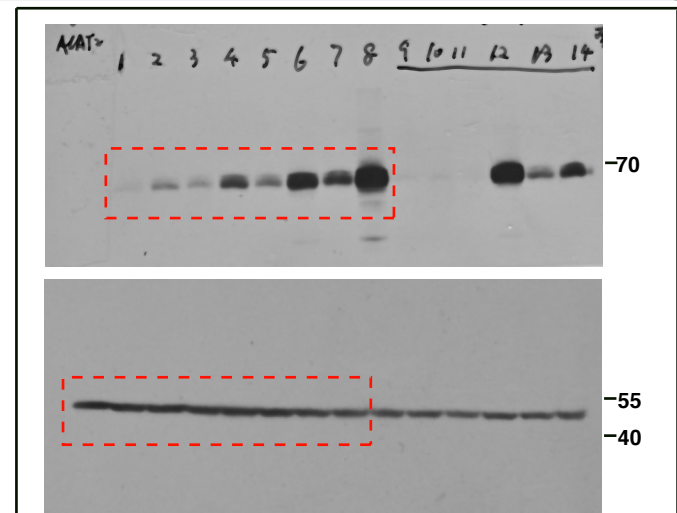

Fig.1g

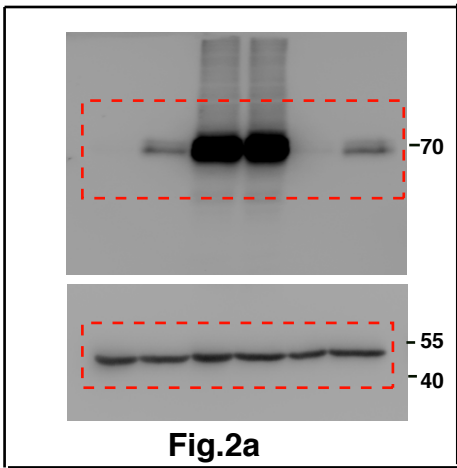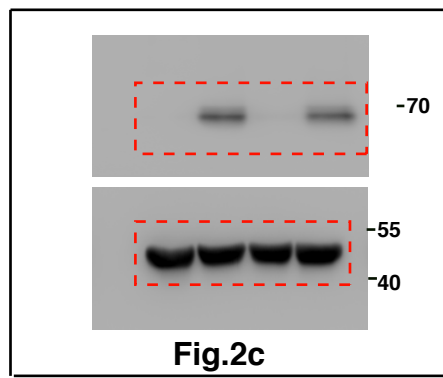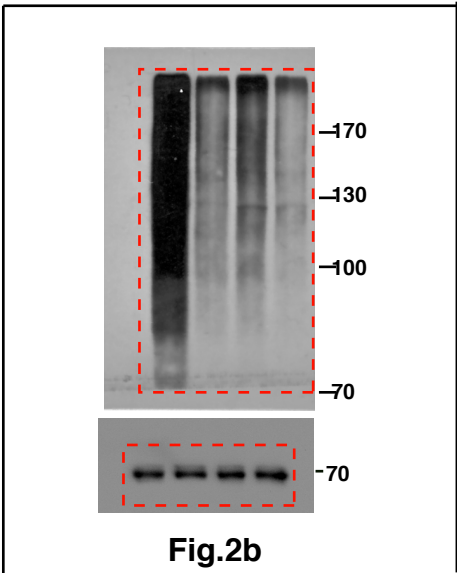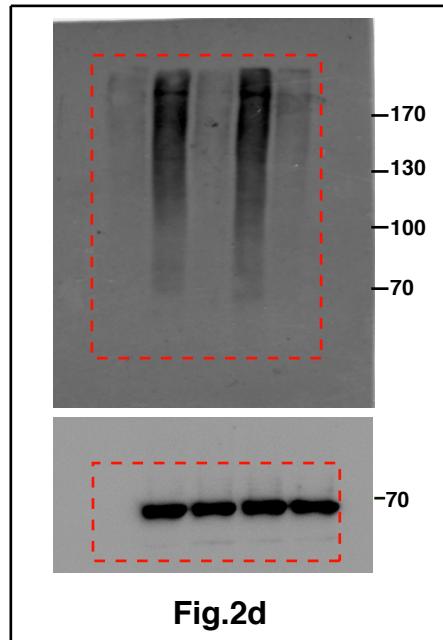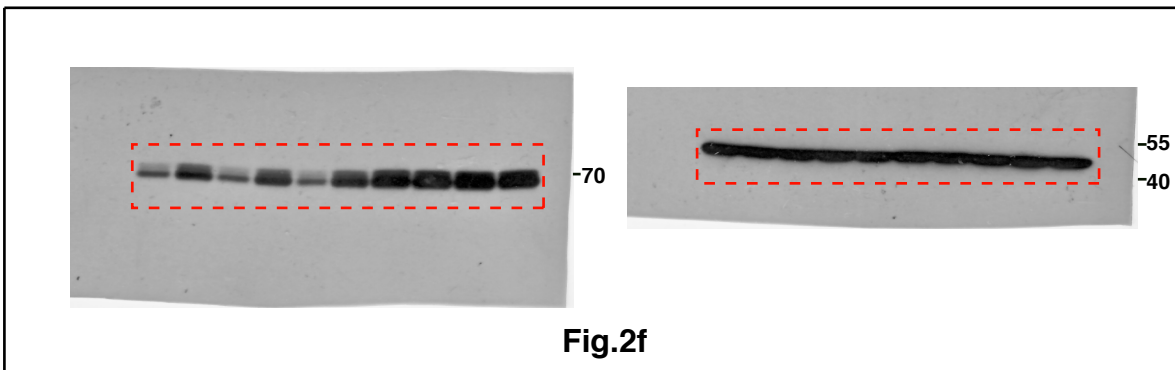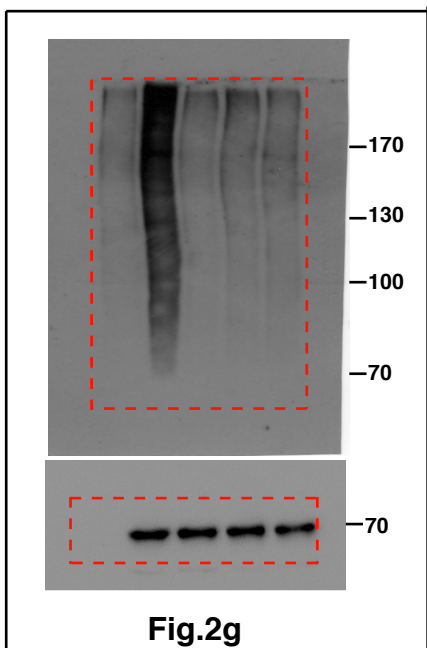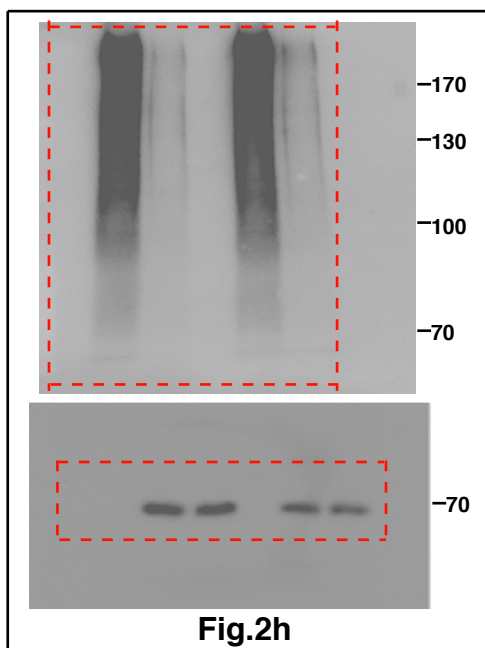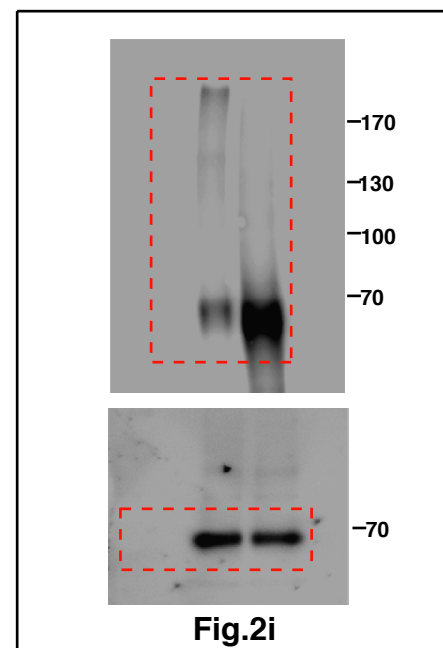

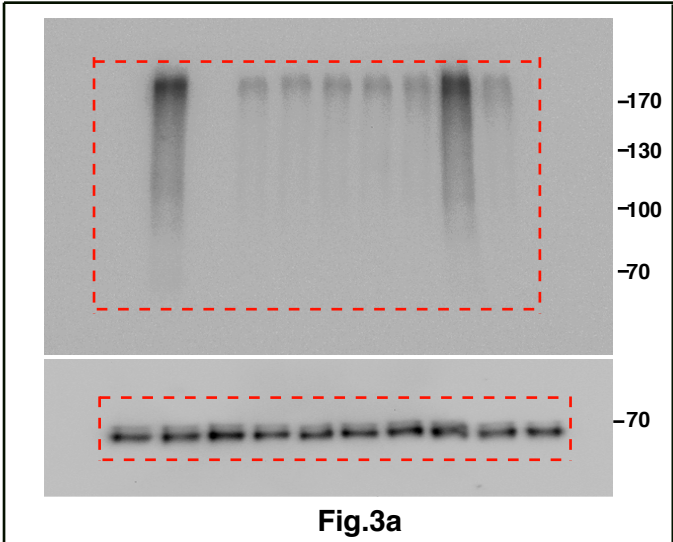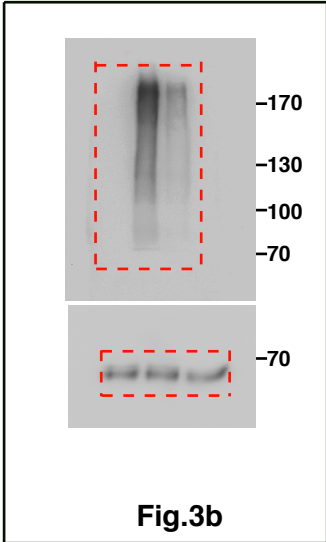

**Original data for Fig.3c**

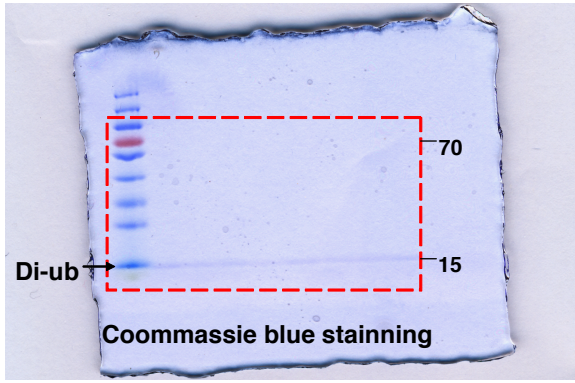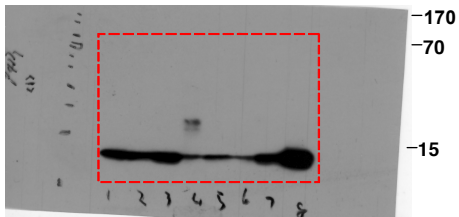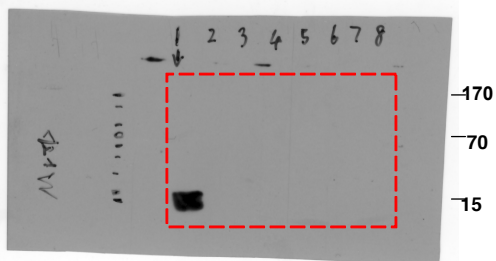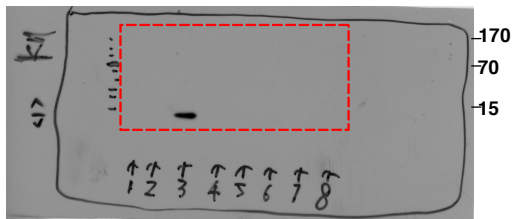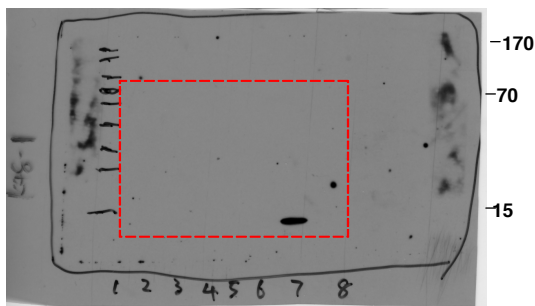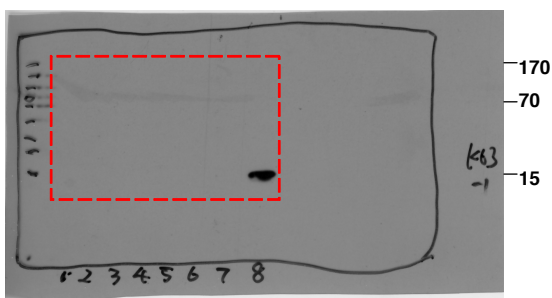

**Original data for Fig.3d**

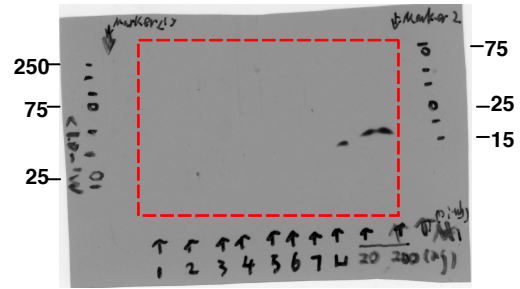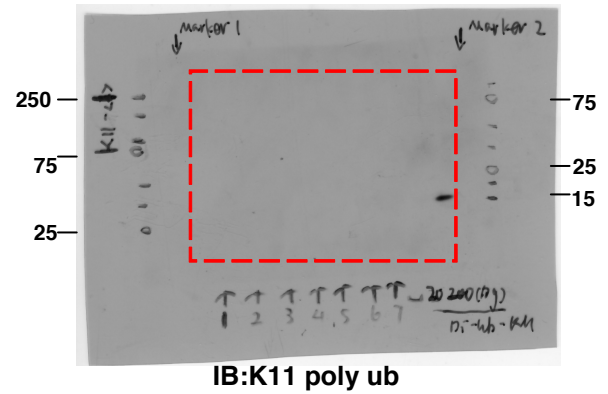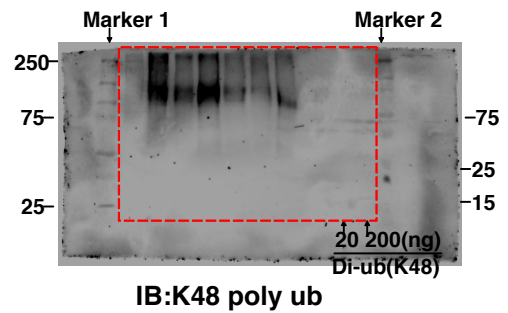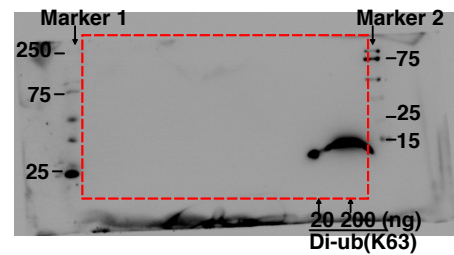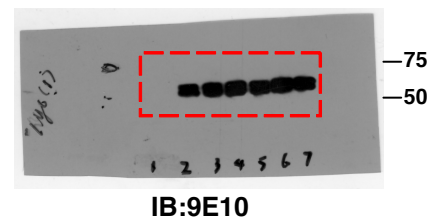

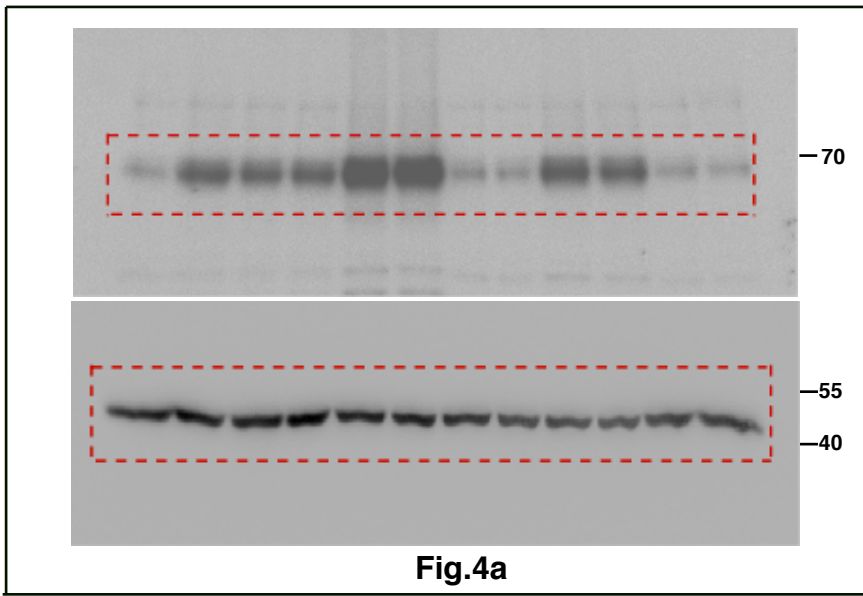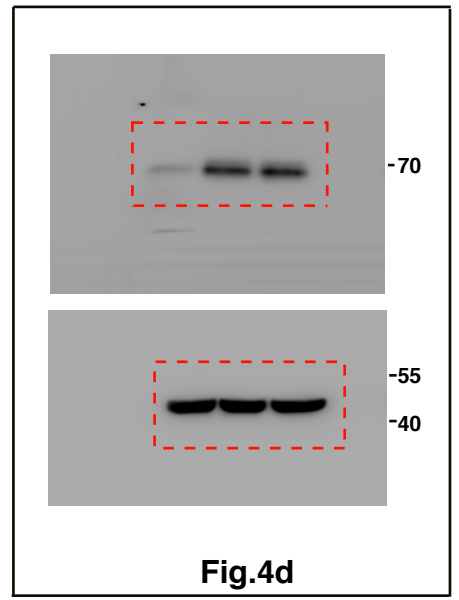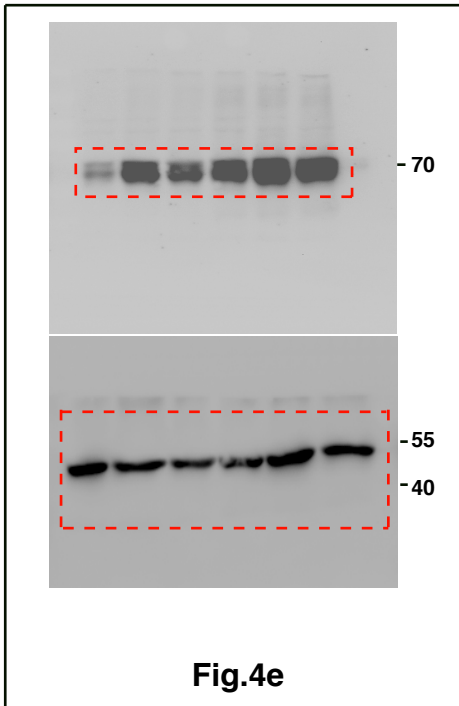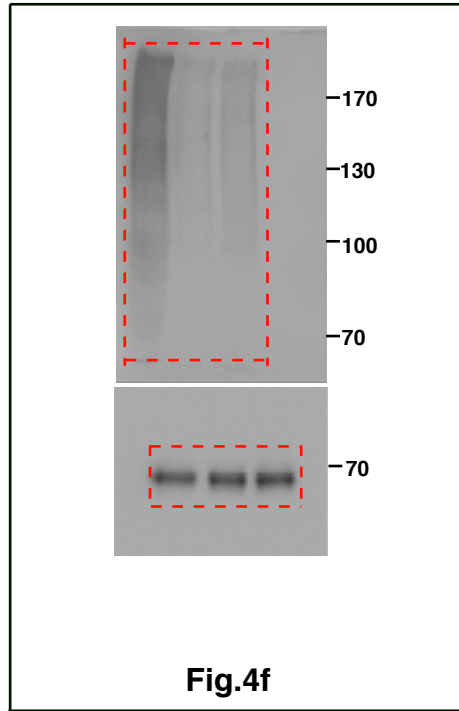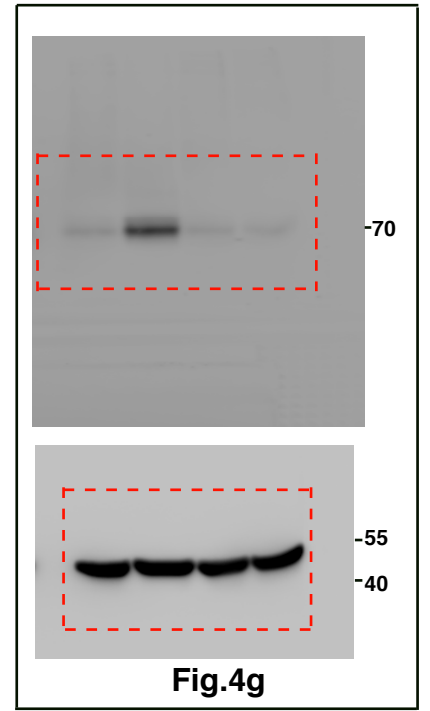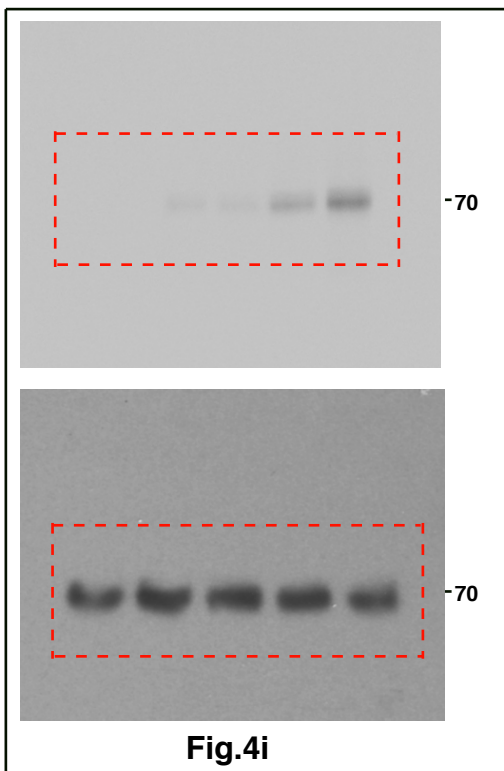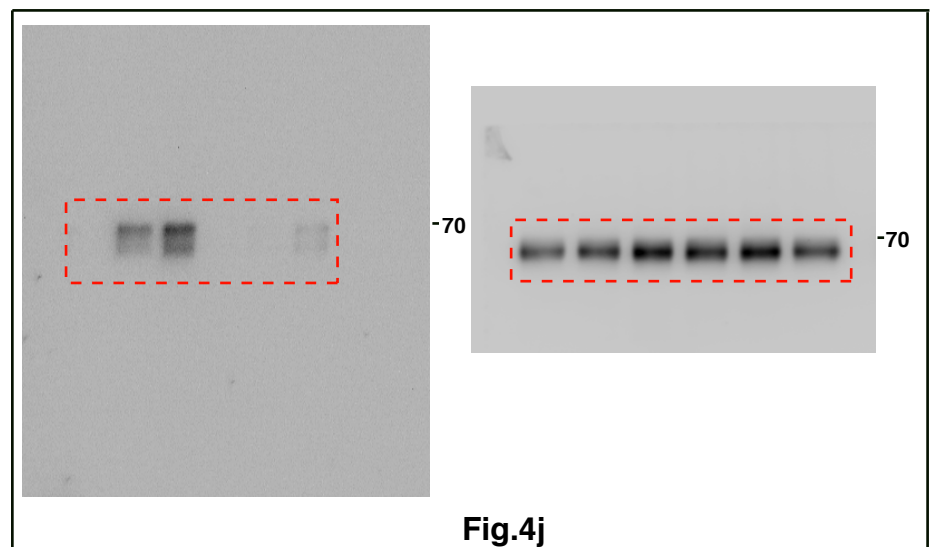

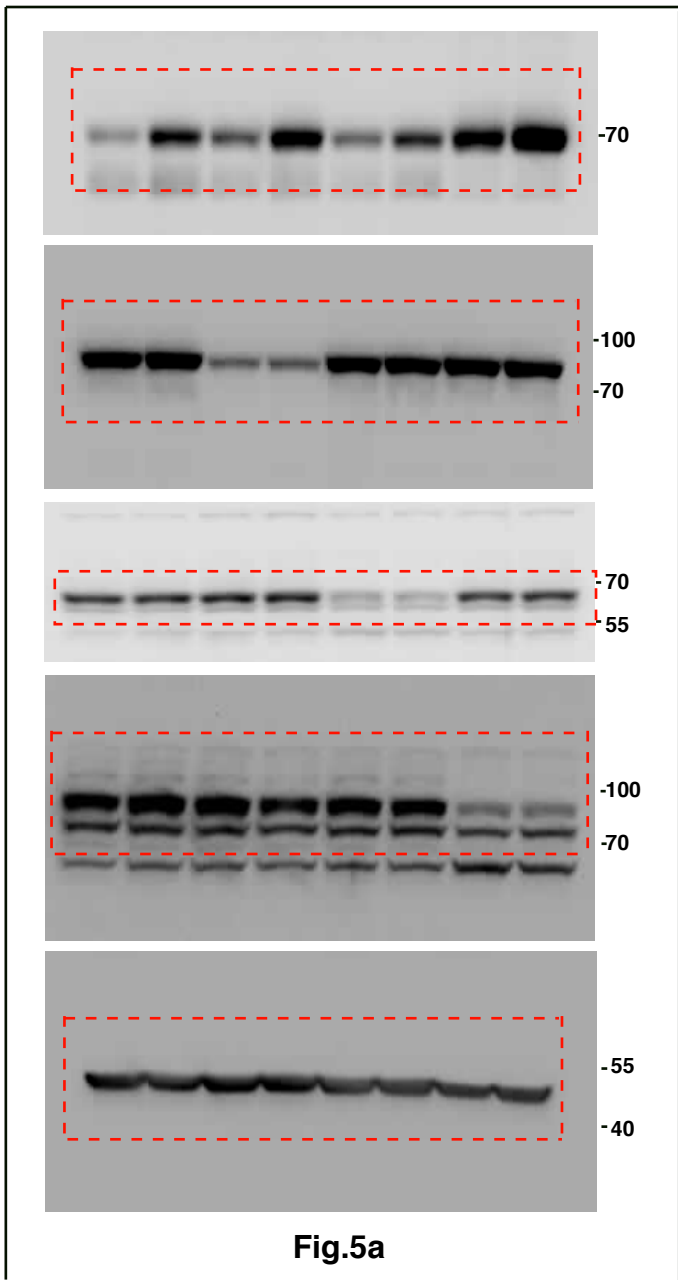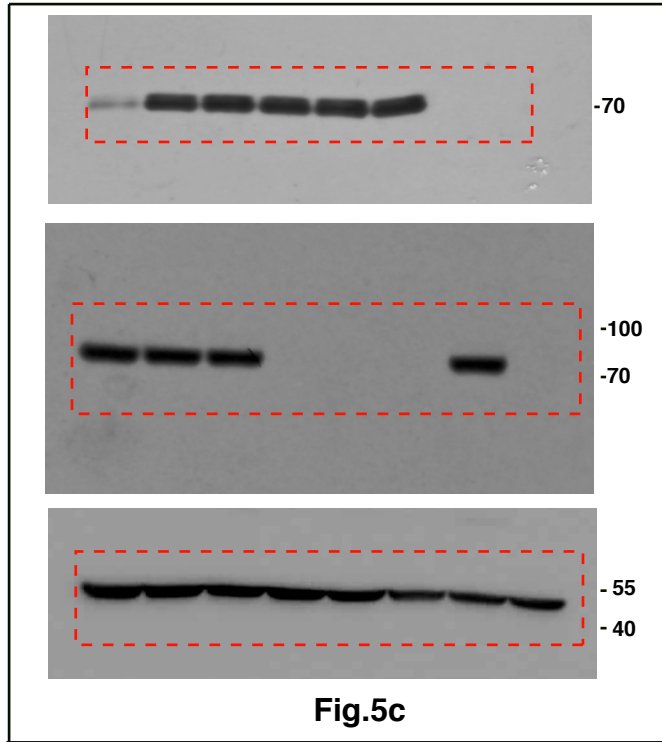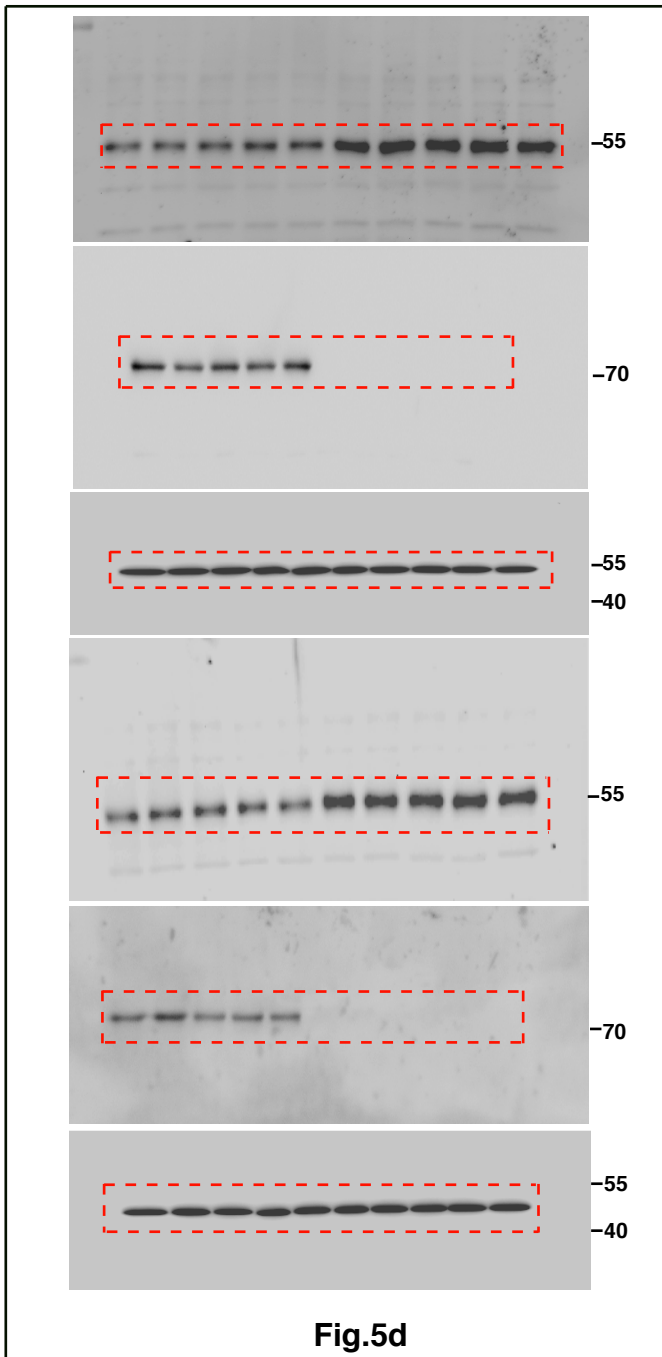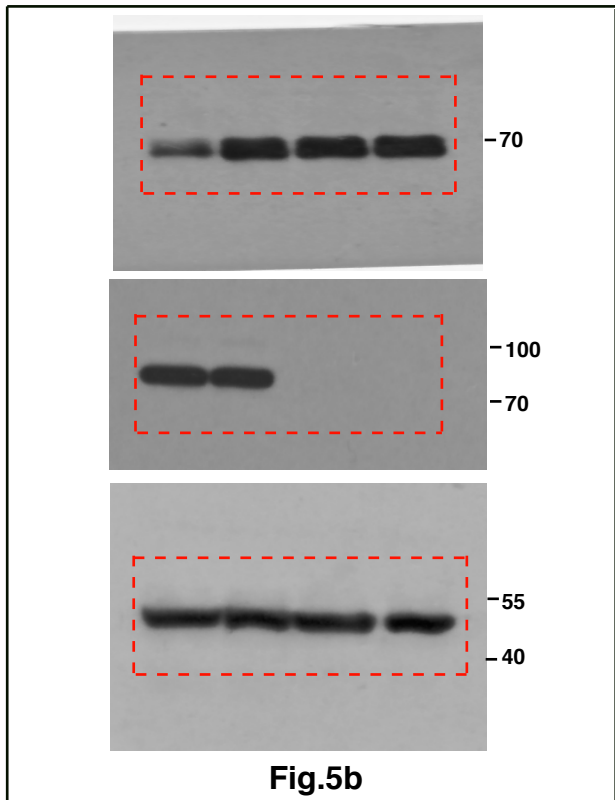

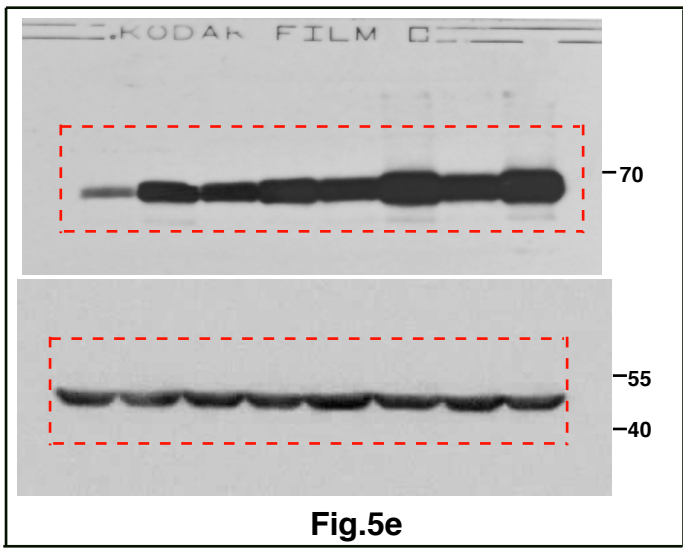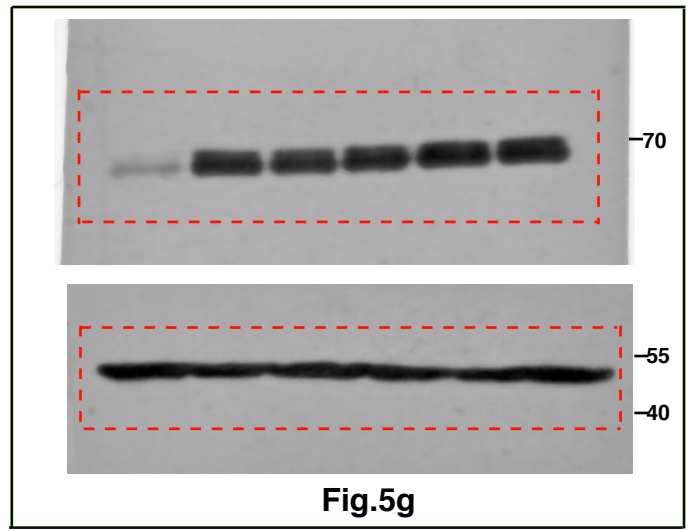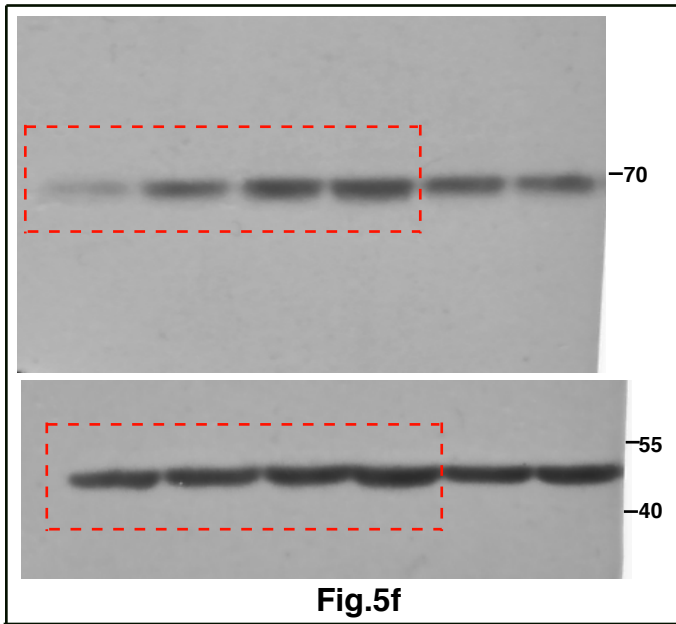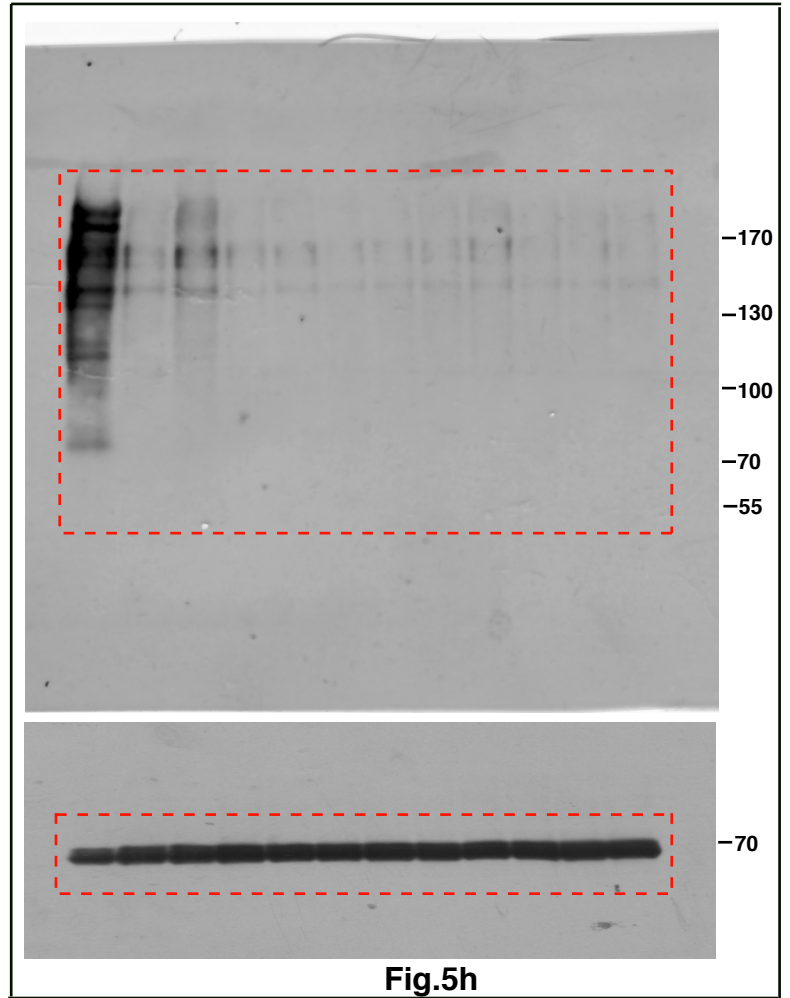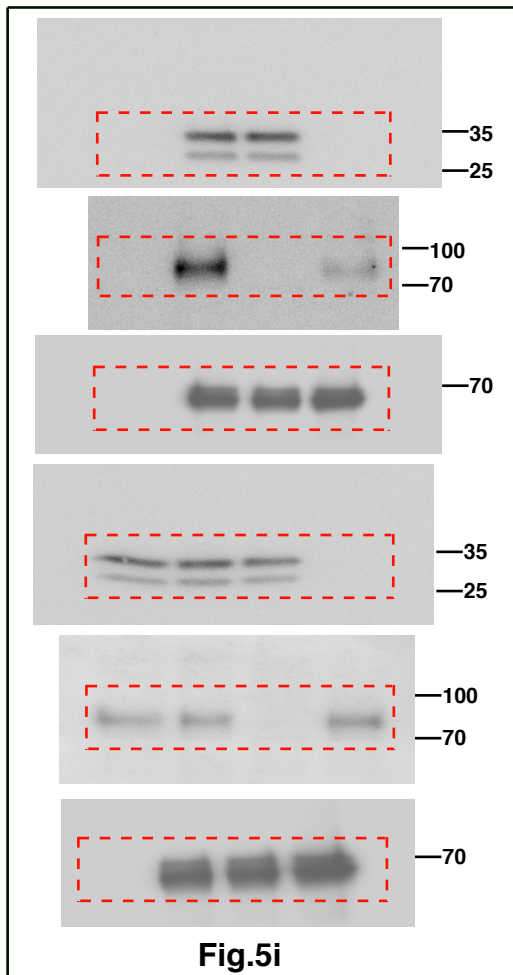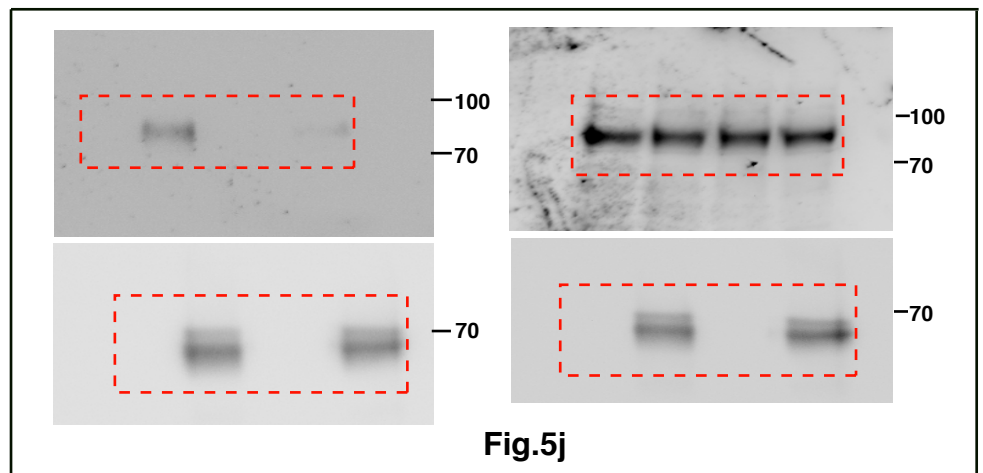

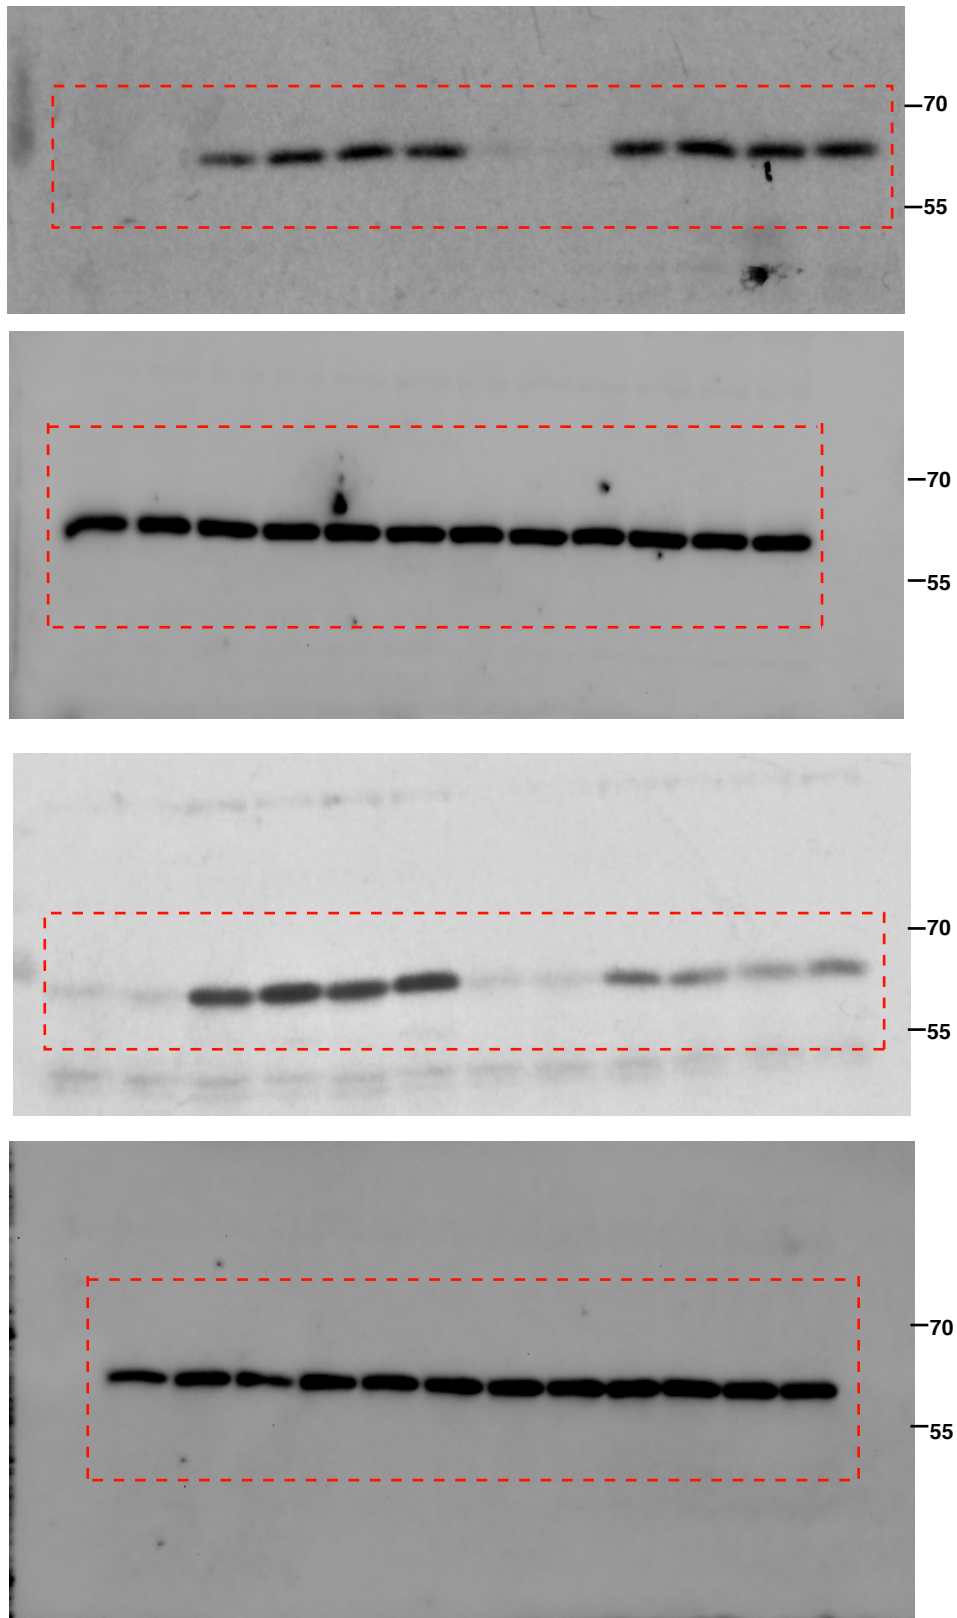

Fig.6d



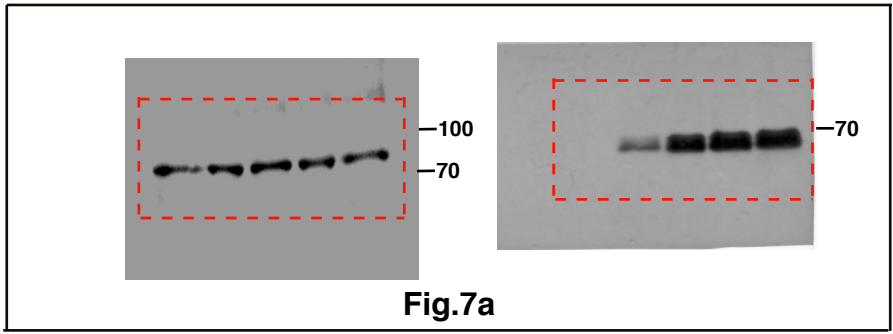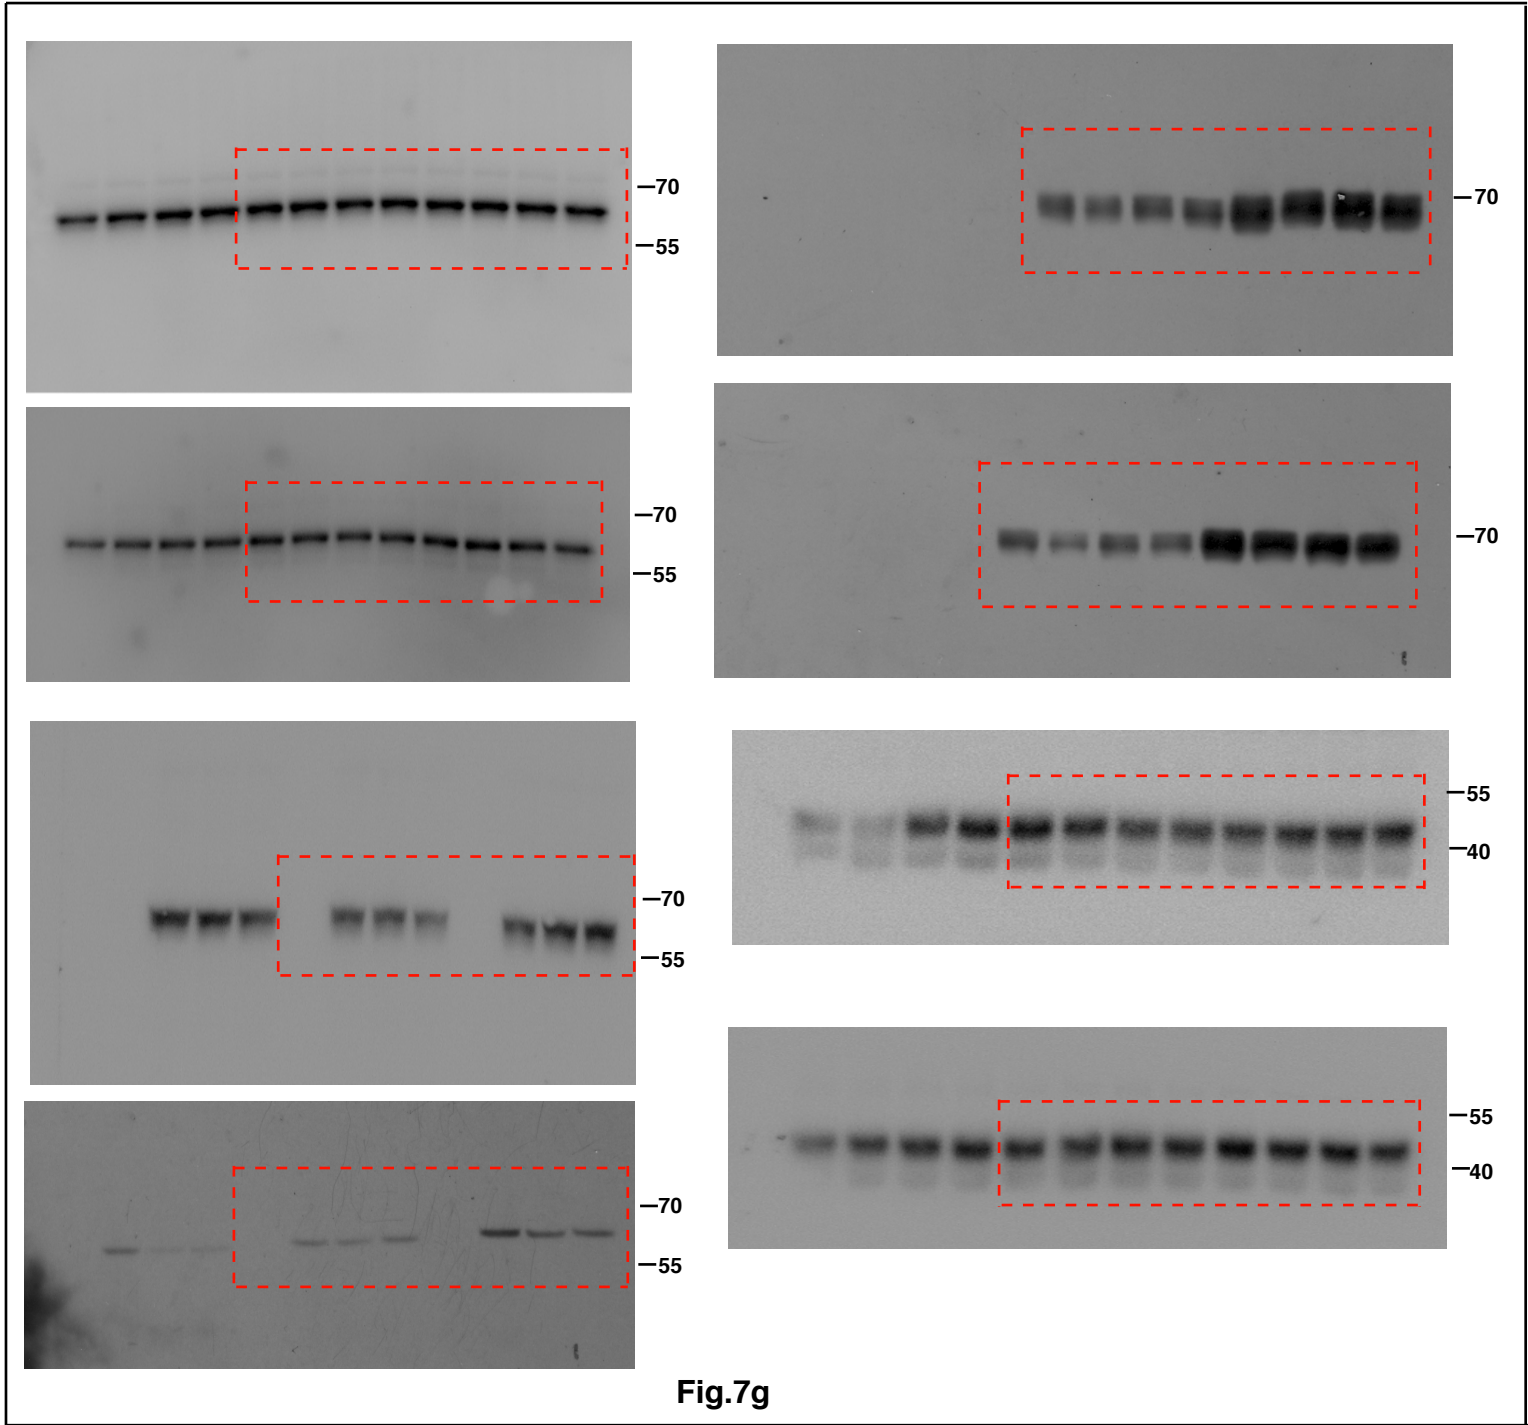

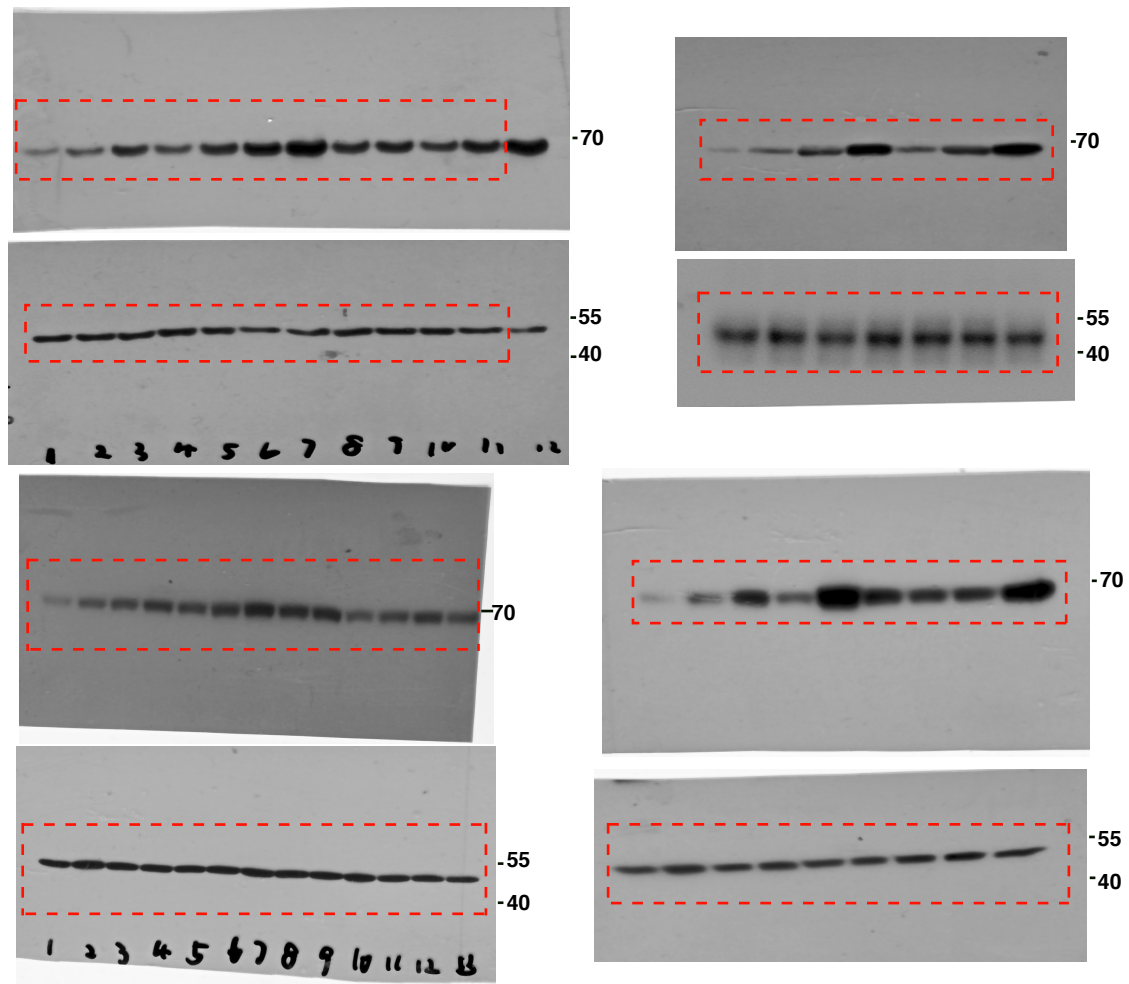

Supplementary Fig.1 b

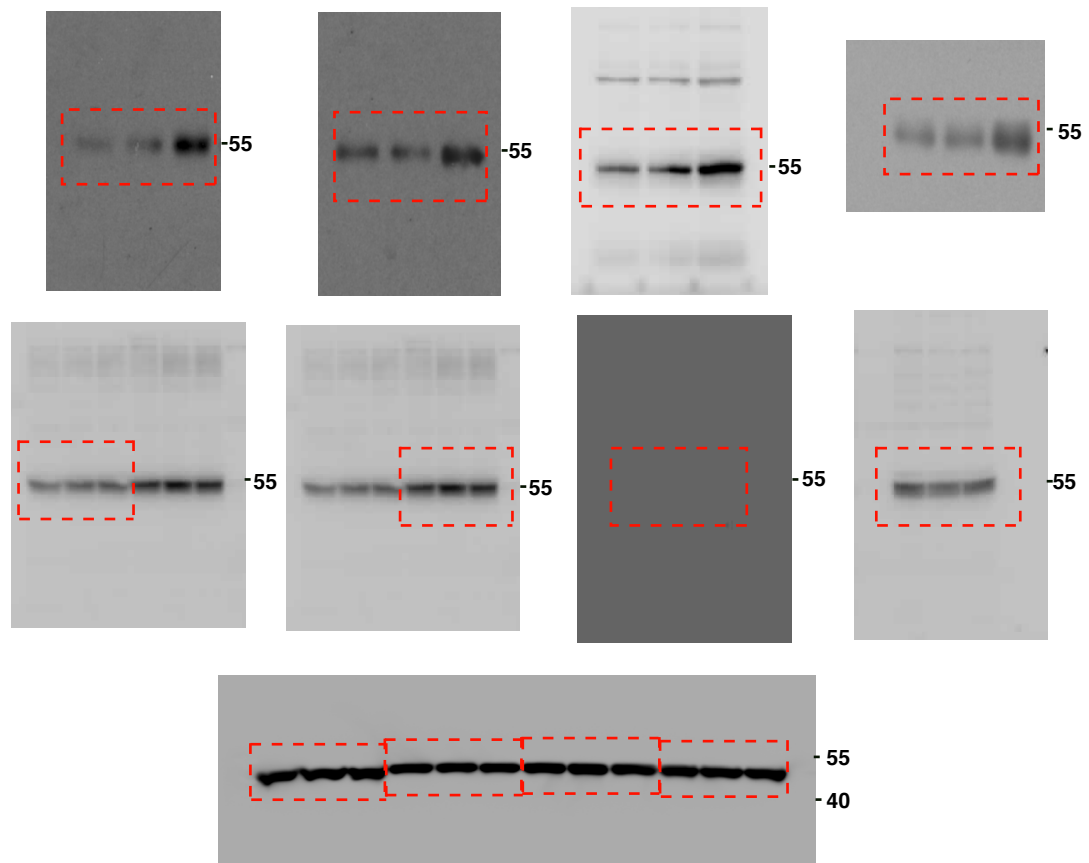

Supplementary Fig.1 c

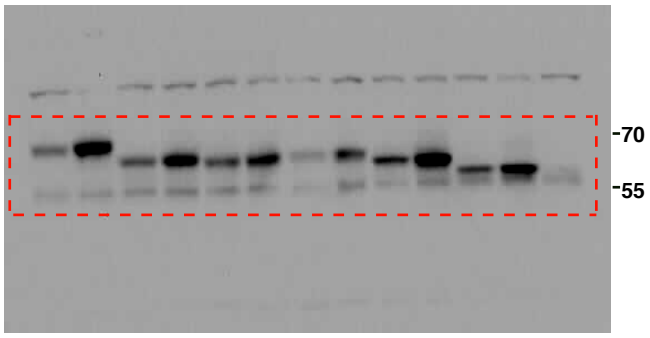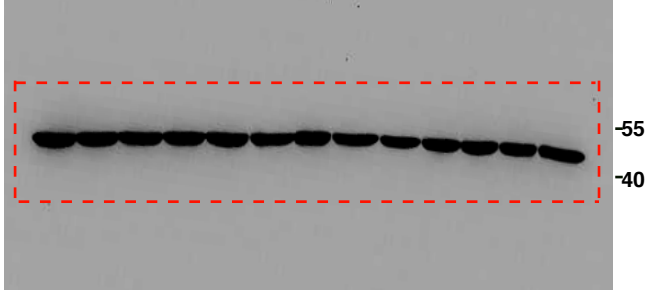

Supplementary Fig.2b

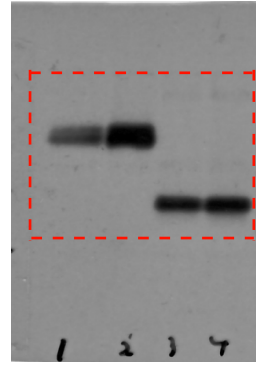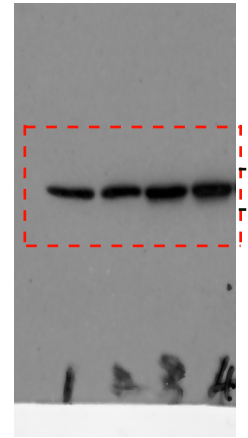

Supplementary Fig.2c

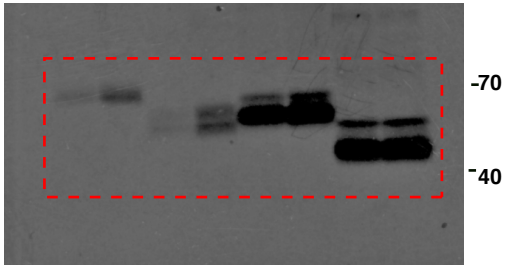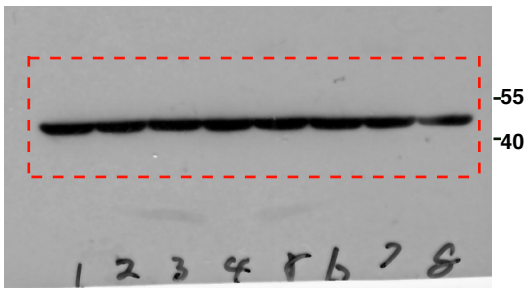

Supplementary Fig.2d

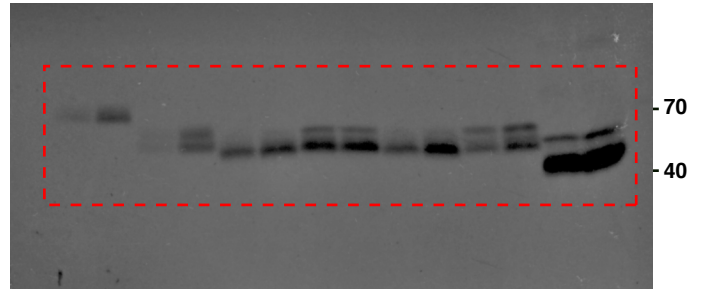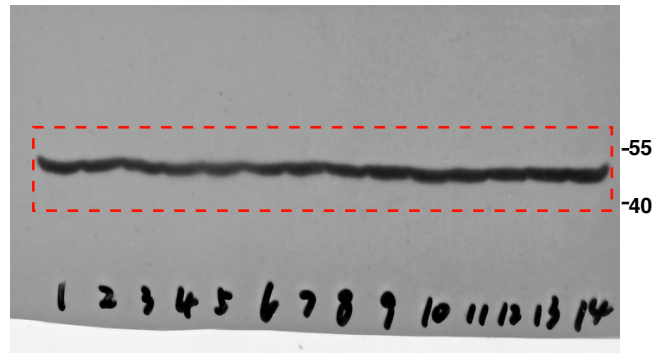

Supplementary Fig.2e

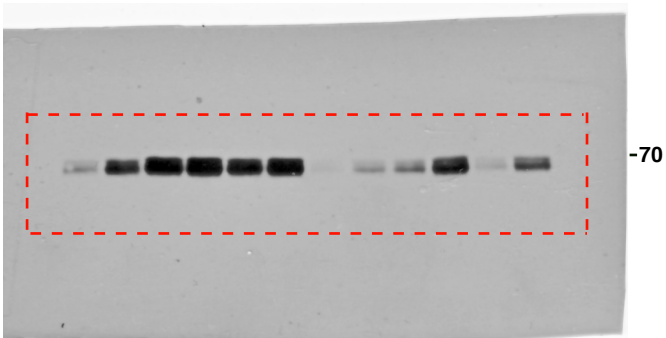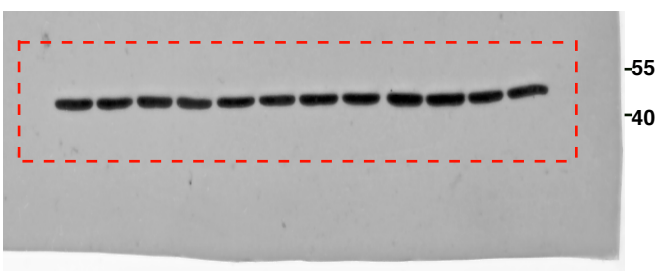

Supplementary Fig.2g

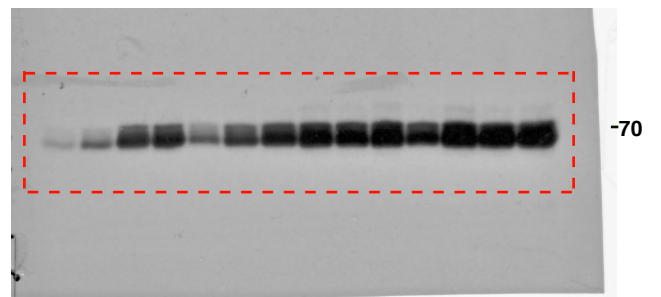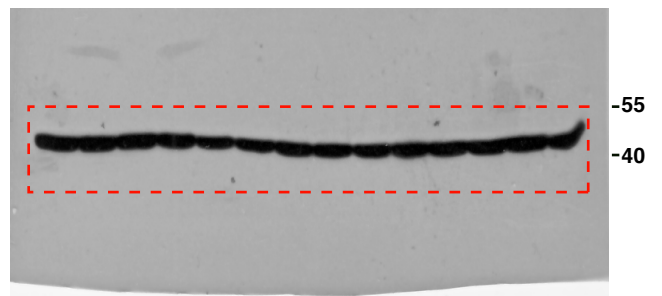

Supplementary Fig.2h

Original data for Supplementary Fig.3a

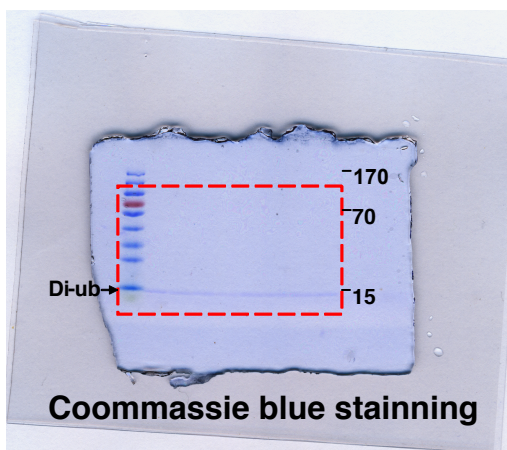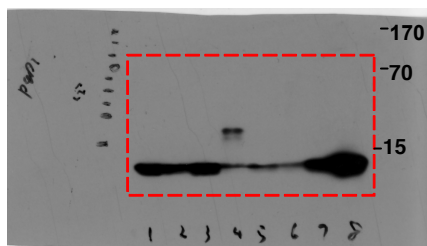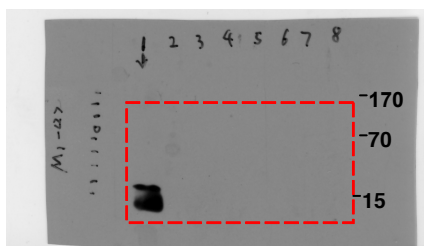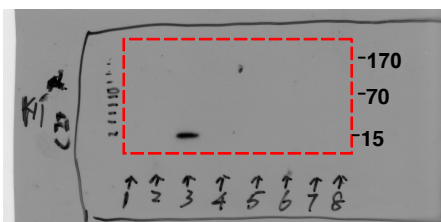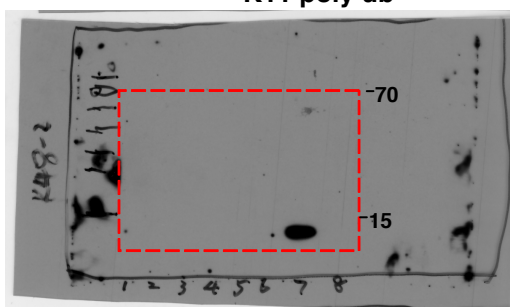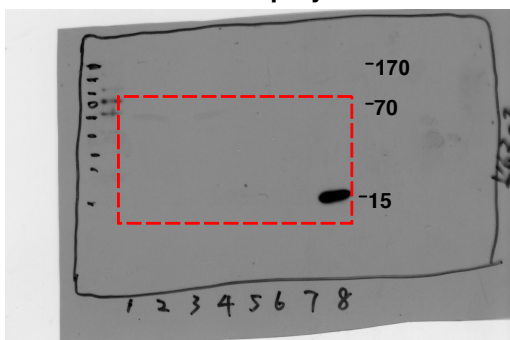

Original data for Supplementary Fig.3b

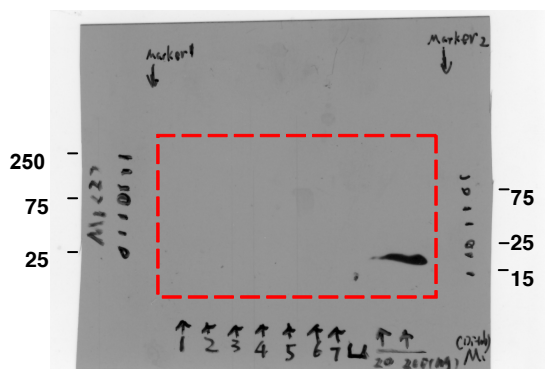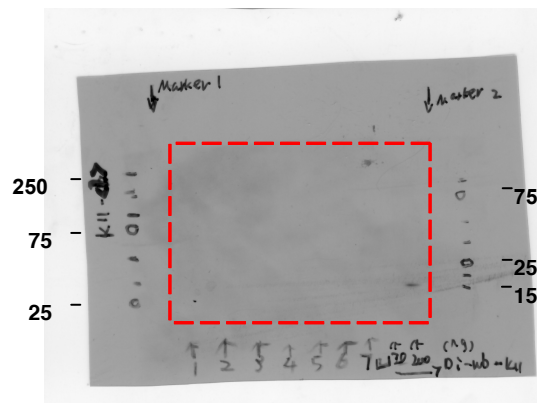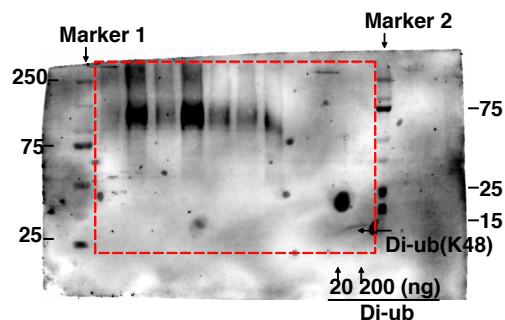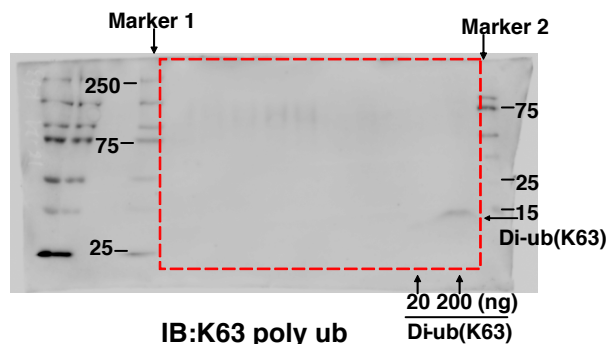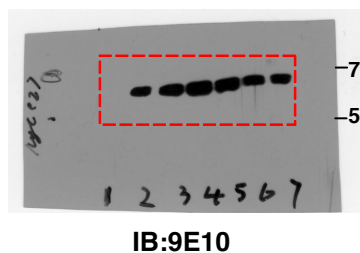

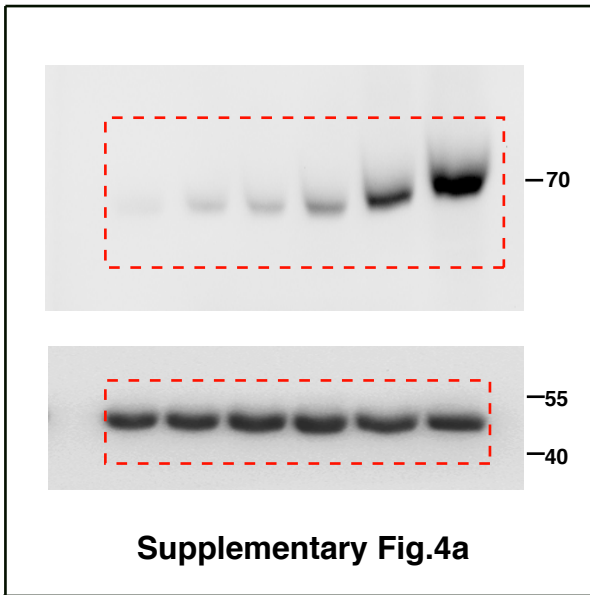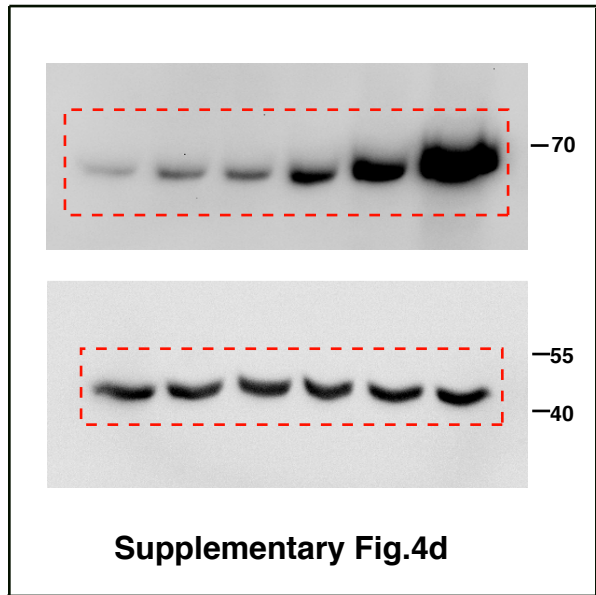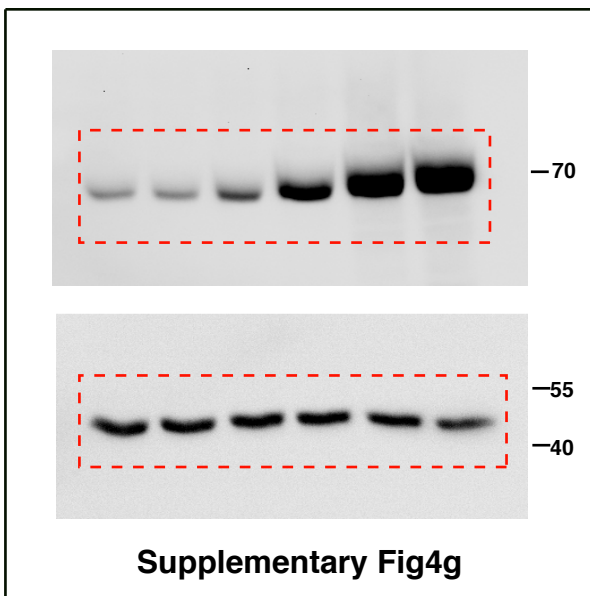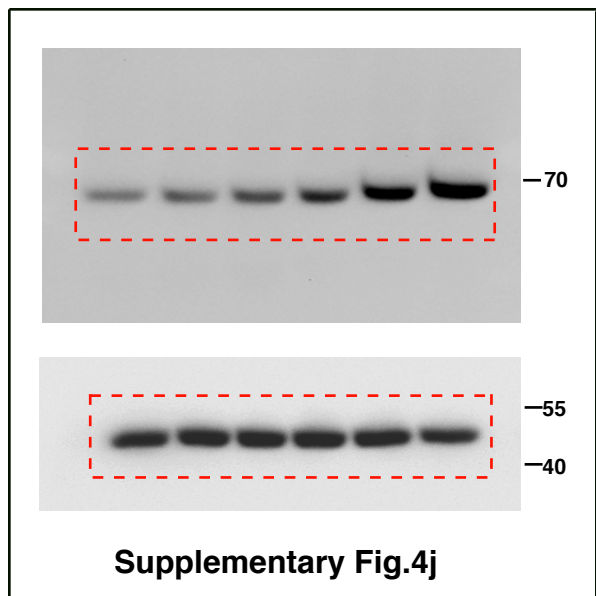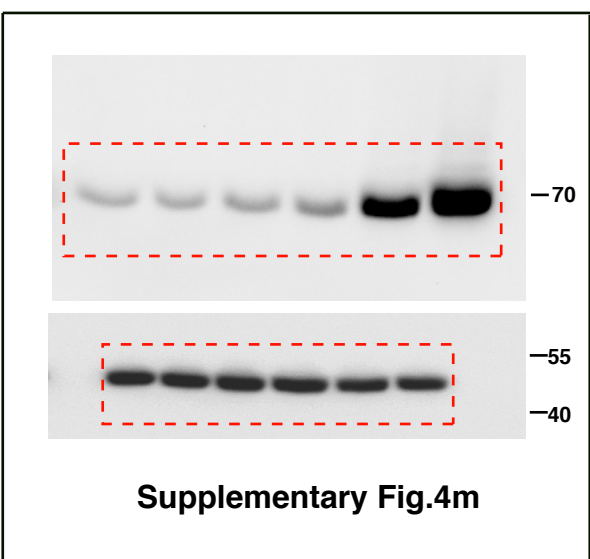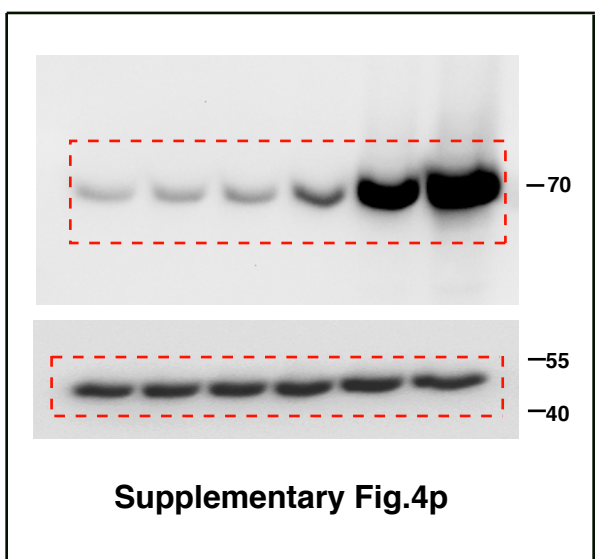

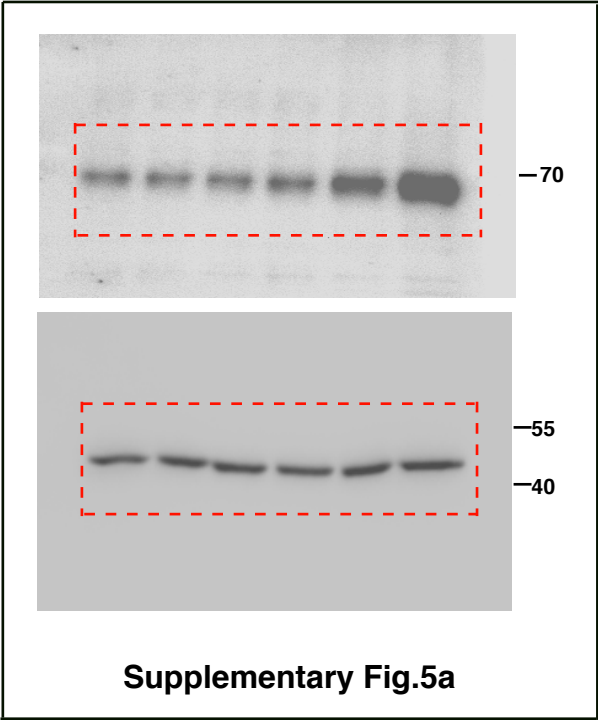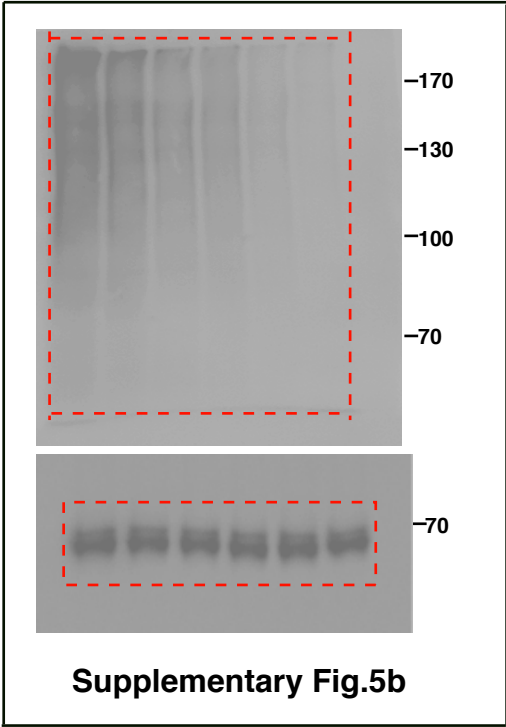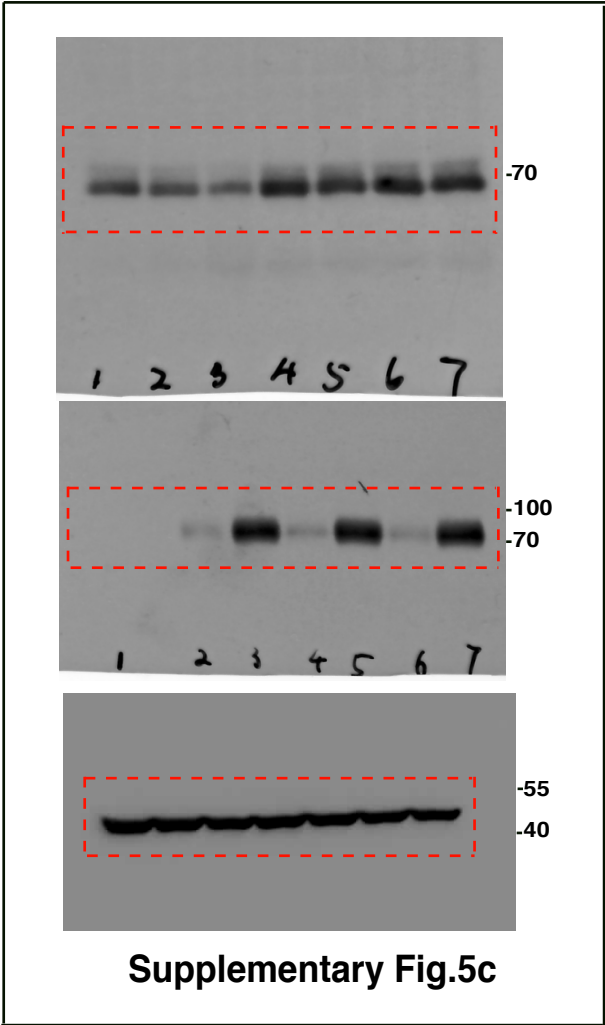

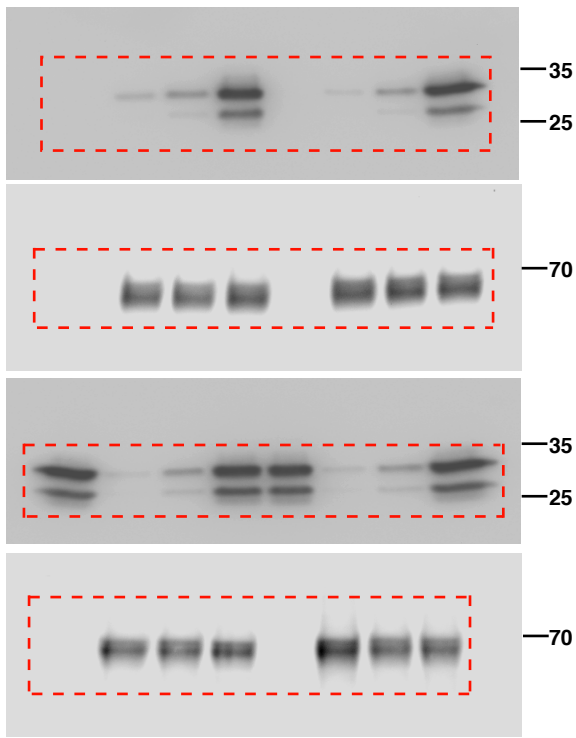

**Supplementary Fig.5d**

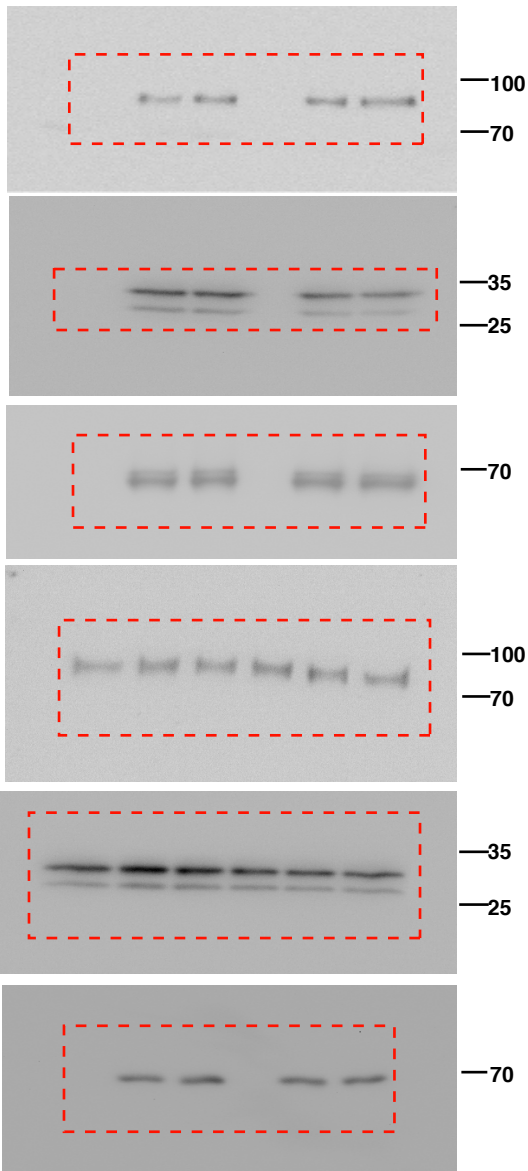

**Supplementary Fig.5g**

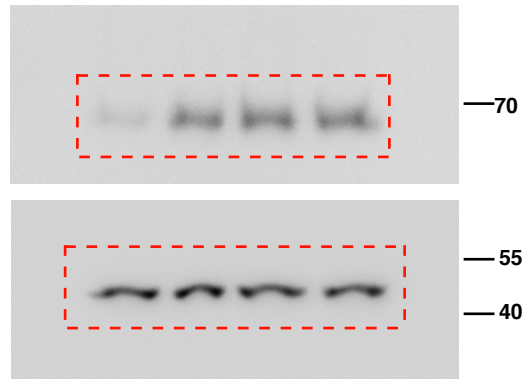

**Supplementary Fig.5f**

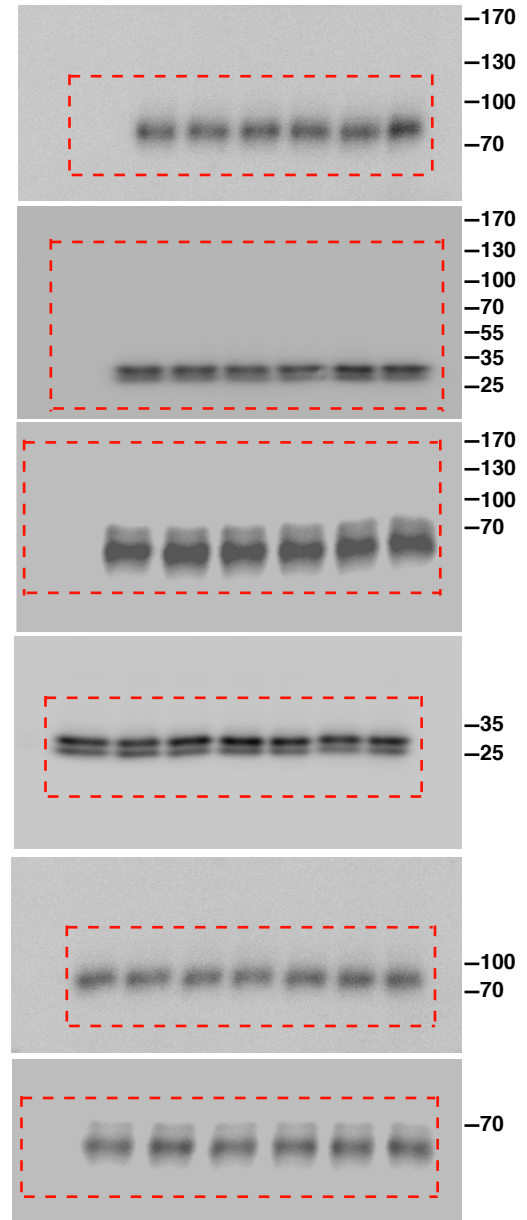

**Supplementary Fig.5e**

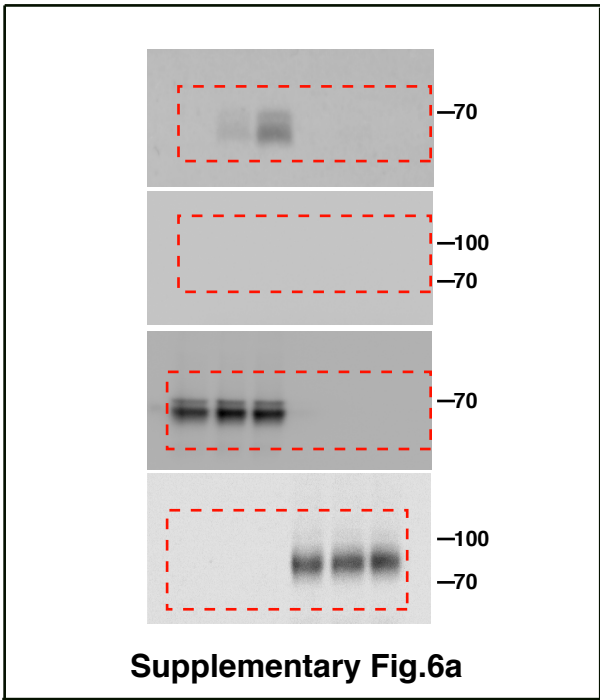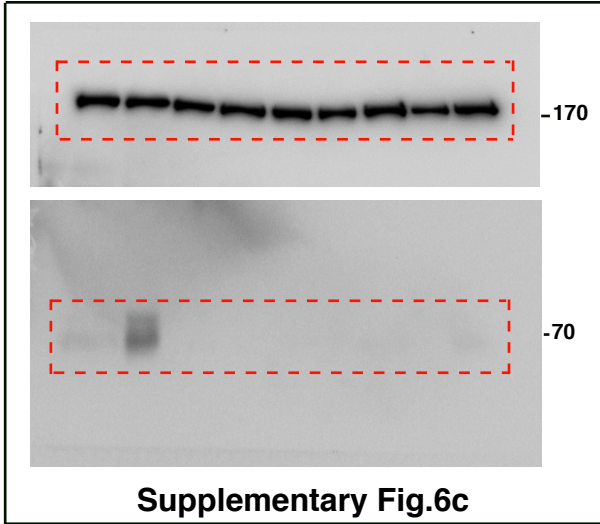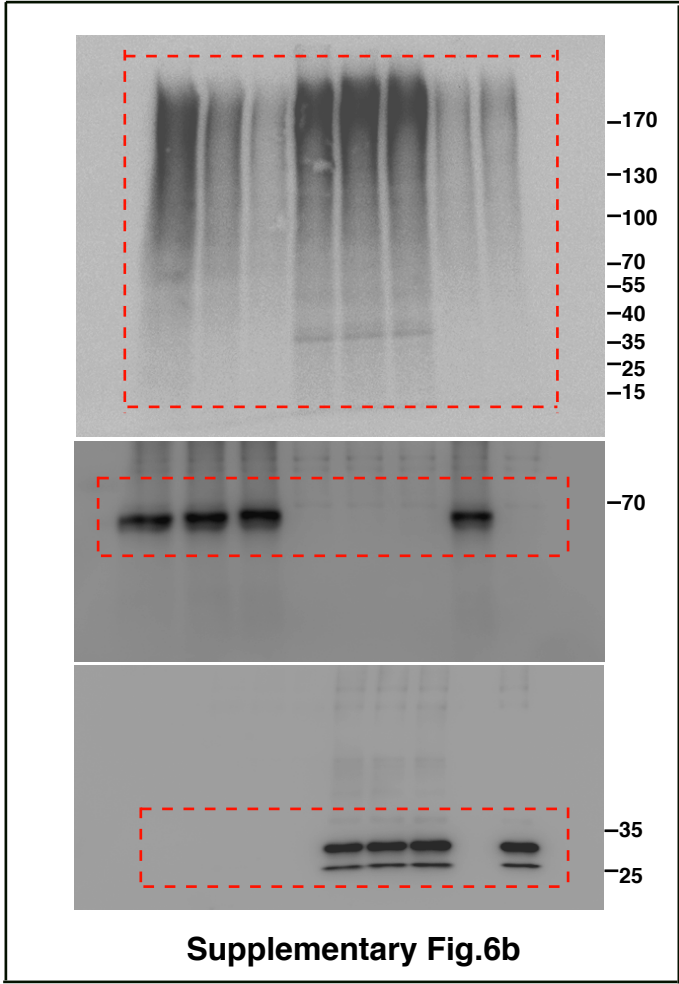

Supplement: NIHMS875729-supplement-9.pdf [file NIHMS875729-supplement-9.pdf]
